# 1 **Increased male mating success in the** 2 **presence of prey and rivals in a sexually** 3 **cannibalistic mantis**

## 4 5 **LAY SUMMARY**

6  
7 Deciding when to approach a mate is critical for male mantises at risk of being cannibalised.  
8 A male might do well to pounce when a female is distracted with prey, but what if a nearby  
9 male has the same intention? In the Springbok mantis, we show that males mate faster and  
10 with greater success when both prey and a rival are present, suggesting that mating decisions  
11 depend on the dual threats of cannibalism and competition.  
12

## 13 **ABSTRACT**

14  
15 Pre-copulatory sexual cannibalism—or cannibalism without mating—is expected to promote  
16 the evolution of male strategies that enhance mating success and reduce the risk of  
17 cannibalism, such as preferential mating with feeding females. However, sexual selection on  
18 male competitiveness may alter male courtship decisions in the face of cannibalism risk. We  
19 investigated the effect of prey availability and rival presence on male mating decisions in the  
20 highly cannibalistic Springbok mantis, *Miomantis caffra*. We found that males approached  
21 females more rapidly and mated more often in the presence of prey, suggesting that females  
22 distracted with foraging may be less of a threat. The presence of a rival also hastened the  
23 onset of copulation and led to higher mating success, with very large effects occurring in the  
24 presence of both prey and rivals, indicating that intrasexual competition may intensify  
25 attraction to foraging females. Taken together, our results suggest that pre-copulatory  
26 cannibalism has selected for male preference for foraging females, and that males adjust their  
27 mating strategy to both the risk of competition and the threat of cannibalism.  
28

29 Key words: sexual cannibalism, mantid, *Miomantis caffra*, mating tactics, sexual conflict,  
30 prey availability, competition

31

32

33

34

35

36

37

38

39

40

41

42

43

44

45

46

47

48

49

50

51

52

53

54

55

56

57

58

59

60

## 61 INTRODUCTION

62

63 Understanding how animals maximise fitness while managing risk is a key focus of  
64 behavioural ecology (Magnhagen 1991; Dall and Johnstone 2002; Dall 2010; Mathot et al.  
65 2012). In sexually cannibalistic species—where females consume males prior to, during, or  
66 immediately following copulation—males must balance the imperative to mate with the  
67 danger of being eaten by females (Elgar 1992). This balancing act is particularly critical in  
68 species where cannibalism occurs without mating (i.e., precopulatory cannibalism) because  
69 males forfeit all current and future reproductive success if they are cannibalised (Elgar and  
70 Schneider 2004).

71

72 Males confronted with extreme costs of precopulatory cannibalism are expected to evolve  
73 behavioural tactics to avert or avoid female aggression (Parker 1979; Elgar 1992; Schneider  
74 2014). A common tactic emphasising distraction occurs when males preferentially approach  
75 feeding females. Female feeding behaviour may be an important trigger for mating initiation  
76 because females distracted by prey may be less likely to attack approaching males (Prenter et  
77 al. 1994; Fromhage and Schneider 2005). In some orb-weaving spiders, males typically wait  
78 for females to feed on prey before entering the web to attempt mating (Fromhage and  
79 Schneider 2005). Similarly, some male mantids prefer feeding females (Scardamaglia et al.  
80 2015) and mate with such females more readily (Gemeno and Claramunt 2006). This  
81 suggests that females in prey-abundant environments may be less dangerous for males to  
82 approach, and therefore the risks of cannibalism in such environments may be reduced.  
83 However, the influence of prey abundance on male mating decisions with respect to  
84 cannibalism risk is poorly understood.

85

86 The presence of competitors could also influence how males interact with cannibalistic  
87 females. Since most sexual cannibals are scramble competitors—where males compete to be  
88 the first to find females and mate (Emlen and Oring 1977; Thornhill and Alcock 1983;  
89 Herberstein et al. 2017)—the presence of male rivals is likely to feature prominently in a  
90 male's calculus of risk (Prokop and Václav 2005). On the one hand, a male may use a  
91 competitor as a decoy or 'sacrificial lamb', timing his approach to coincide with a female  
92 stalking, attacking or eating the competitor. On the other hand, the presence of rivals may  
93 intensify a male's motivation to mate, which may lead to faster mating approaches and

94 increased mating success, as occurs in non-cannibalistic taxa (Simmons 1986; Beani and  
95 Turillazzi 1990; Price and Rodd 2006). Such a lack of caution may however lead to a higher  
96 incidence of cannibalism due to hasty missteps (Stoltz et al. 2008). If males pay attention to  
97 female foraging behaviour, the presence of prey could modulate competition among males in  
98 non-additive ways. For example, if males approach feeding females faster than they approach  
99 non-feeding females, the presence of a rival may intensify the speed of their approach,  
100 resulting in either higher mating success or higher mating failure due to cannibalism. While  
101 effects of female feeding behaviour and rival presence have been investigated in isolation,  
102 how such factors interact to shape anti-cannibalism behaviours in males is currently unclear.  
103

104 The Springbok mantis, *Miomantis caffra*, is an excellent system for investigating effects of  
105 prey and competitors on male mating decisions in response to the risk of cannibalism. As in  
106 many other mantises, males are scramble competitors (Maxwell 1999). However, unlike most  
107 cannibalistic species, pre-copulatory cannibalism occurs at an extremely high rate: more than  
108 60% of inter-sexual encounters end in cannibalism without mating, one of the highest known  
109 natural rates of cannibalism (Walker and Holwell 2016). Males have limited capacity to  
110 assess the likelihood of being attacked since female aggression is not consistent within  
111 individuals (Fisher et al. 2020), and is uninfluenced by female body size, condition, or  
112 feeding regime (Walker and Holwell 2016). Females are also facultative parthenogens which  
113 means they can produce viable offspring asexually without mating, via parthenogenesis  
114 (Walker and Holwell 2016). This unique confluence of traits is expected to impose strong  
115 selection on males to evolve tactics that, on the one hand, increase their competitive edge  
116 against rivals, and, on the other, mitigate the risk of mating failure due to cannibalism.  
117

118 We conducted a laboratory experiment on *M. caffra* in which the presence of prey and the  
119 presence of a rival were simultaneously manipulated. We hypothesised that males would pay  
120 attention to female feeding behaviour by approaching females faster and mating more  
121 frequently when prey were present. We also suspected that competition would increase the  
122 motivation of males to mate, with the fastest onset of sexual contact occurring in the presence  
123 of both prey and a rival. Due to the distracting nature of prey, we further predicted that  
124 competition would enhance male mating success when prey were present, but would  
125 exacerbate the incidence of cannibalism when prey were absent.

126  
127

## 128 **METHODS**

129

130 To investigate the influence of rival and prey presence on mating and cannibalism, we  
131 performed a fully factorial mating experiment consisting of two interacting treatments that  
132 manipulated the presence of heterospecific prey and conspecific males. We placed individual  
133 adult virgin females that had not yet oviposited ( $n = 76$ ; 19 females per treatment  
134 combination) into separate 30 x 30 x 30 cm mesh enclosures containing a bunch of artificial  
135 plastic leaves and introduced either one or two adult males ('rival treatment'), and either 40  
136 house flies or no flies ('prey treatment'). To prevent confounding due to differences in female  
137 satiation levels between the prey treatment groups, females in the 'prey absent' group were  
138 each housed with 40 flies for the 12 hours immediately prior to the experimental trial, while  
139 females in the 'prey present' group were provided with 3 flies during this same period.  
140 Observations of mating and/or cannibalism were made every hour for 8 hours. The  
141 experiment was conducted in several blocks over multiple days due to space constraints. All  
142 mantises were obtained as juveniles from numerous locations in Auckland, New Zealand.

143

144 To analyse the likelihood of mating and cannibalism, we used generalised linear models  
145 (GLMs) with binomial error structures and logit link functions. Mating outcome and  
146 cannibalism outcome were treated as separate binary response variables, and rival treatment,  
147 prey treatment and their interaction were included as fixed effects. A Cox proportional  
148 hazards regression model was used to assess treatment differences in the onset of mating.  
149 Latency to mate (measured in hours) was the response variable, with rival treatment, prey  
150 treatment, and their interaction fitted as fixed effects. Individuals that did not mate were  
151 treated as censored observations.

152

153 We used likelihood ratio tests to assess the significance of fixed effects in all models. This  
154 was done by removing each fixed effect from a reduced model that had nonsignificant  
155 higher-level interactions removed. The significance of interactions was similarly assessed by  
156 removing interaction effects from the full model. Trial date was initially included as a  
157 categorical covariate but was later excluded from all analyses as no block effects were  
158 detected ( $-8.911 \leq \chi^2 \leq 7.656$ ,  $0.780 \leq P \leq 0.865$ ). For effect sizes of mating success,  
159 we report standardised mean differences ( $d$ ) and 95% confidence intervals (CI) using the

160 probit transformation for binary response data (Glass et al. 1981). We report hazard ratios  
161 (HR) and their 95% CIs for mating onset effect sizes.

162

## 163 RESULTS

164

165 Males initiated mating nearly 4 times quicker when prey were present (Cox model: HR  
166 = 3.799, CI = 1.588 to 9.088; analysis of deviance:  $\chi^2 = 10.359$ ,  $P = 0.001$ ; Figure 1),  
167 and 3 times quicker when a rival male was present (Cox model: HR = 2.968, CI =  
168 1.285 to 6.857; analysis of deviance:  $\chi^2 = 7.123$ ,  $P = 0.008$ ; Figure 1). Speed was  
169 enhanced by the presence of both factors. When a rival was present, the addition of prey  
170 increased the speed of approach by 4 times (HR = 4.034, CI = 1.446 to 11.260; Figure 1),  
171 and when prey were present, the addition of a rival increased the speed of approach by nearly  
172 6 times (HR = 5.587, CI = 1.825 to 17.100; Figure 1). By comparison, when only a rival  
173 was present, mating onset was less than twice as fast as when no rival or prey were present  
174 (HR = 1.770, CI = 0.423 to 7.410; Figure 1), and the presence of only prey had a near  
175 equivalent effect on mating onset as the presence of no rival or prey (HR = 1.322, CI =  
176 0.296 to 5.907; Figure 1). Despite the pattern of interaction suggested by these effect sizes  
177 and CIs, there was no significant interaction effect between prey and rival presence in the  
178 model (Cox model: HR = 3.068, CI = 0.500 to 18.821; analysis of deviance:  $\chi^2 = 1.427$ ,  
179  $P = 0.232$ ).

180

181 The incidence of mating increased 171% in the presence of prey (mating incidence: prey  
182 present: 19/38, prey absent: 7/38;  $d = 0.899$ , CI = 0.289 to 1.510 ; GLM coefficient =  
183 1.639; analysis of deviance:  $\chi^2 = -9.460$ ,  $P = 0.002$ ; Figure 2), and 125% in the presence  
184 of a male rival (mating incidence: rival present: 18/38, rival absent: 8/38;  $d = 0.739$ ,  
185 CI = 0.138 to 1.339; GLM coefficient = 1.391; analysis of deviance:  $\chi^2 = 6.7585$ ,  
186  $P = 0.009$ ; Figure 2). Prey and rival presence had large interactive effects. The addition of a  
187 rival increased mating success by 180% when prey were present (mating incidence: rival with  
188 prey: 14/19, no rival with prey: 5/19;  $d = 1.267$ , CI = 0.409 to 2.125; Figure 2), but only  
189 33% when prey were absent (mating incidence: rival without prey: 4/19, no rival or prey:  
190 3/19;  $d = 0.199$ , CI = -0.732 to 1.129; Figure 2). Similarly, the presence of prey  
191 enhanced mating success by 250% when a rival was present ( $d = 1.257$ ,

192 CI = 0.345 to 2.169; Figure 2), but only 67% when a rival was absent ( $d = 0.370$ , CI =  
193  $-0.542$  to  $1.281$ ; Figure 2). Although the effect sizes and CIs of these pairwise comparisons  
194 suggest that prey and rival presence enhanced mating success only when they occurred  
195 together, there was no significant interaction effect according to the model  
196 (GLM coefficient =  $1.707$ ; analysis of deviance:  $\chi^2 = -2.295$ ,  $P = 0.130$ ).

197 Cannibalism was observed in 2 out of 76 trials, and its occurrence was unaffected by any  
198 treatment ( $-17.676 \leq$  GLM coefficient  $\leq 35.351$ ; analysis of deviance:  $-2.827 \leq \chi^2 \leq 0$ ,  
199  $0.093 \leq P \leq 1$ ). We observed no incidences of females eating one male while  
200 simultaneously copulating with the other.

201

## 202 **DISCUSSION**

203

204 Our results support the idea that sexually antagonistic selection favours the evolution of male  
205 strategies that prevent sexual cannibalism and enhance mating success (Elgar 1992;  
206 Schneider and Lubin 1998; Elgar and Schneider 2004). We found that matings were initiated  
207 more often and more rapidly in the presence of prey, suggesting that males use female  
208 foraging behaviour as a cue to determine the safest time to approach—a common male  
209 strategy in sexually cannibalistic taxa (Prenter et al. 1994; Elgar and Fahey 1996; Fromhage  
210 and Schneider 2005; Gemeno and Claramunt 2006). Although males were probably attracted  
211 to foraging females because of the lower risk they posed, we found no difference in the  
212 incidence of cannibalism among treatments. Indeed, rates of cannibalism were significantly  
213 lower than those previously reported for this species—a finding likely to be driven by the  
214 extremely high satiation levels experienced by females in our experimental design.

215 Nonetheless, as predicted under scramble competition, males responded to the presence of a  
216 rival by approaching females faster and more frequently. This effect appeared to depend on  
217 the presence of prey: males with both rivals and prey present initiated mating 4 times faster  
218 and were 3.5 times more successful than those with only rivals. Taken together, our results  
219 illustrate how the risk of mating failure due to precopulatory cannibalism can alter selection  
220 on male mating decisions in context-dependent ways, and highlights the potential for sexual  
221 selection to modulate antagonistic interactions in sexually cannibalistic taxa.

222

223 Our results suggest that males pay attention to the feeding behaviour of females when  
224 deciding when to initiate mating. Such a strategy has been suggested for other cannibalistic  
225 taxa where males preferentially approach females that are actively handling or eating prey  
226 (Prenter et al. 1994; Fromhage and Schneider 2005; Gemeno and Claramunt 2006). However,  
227 it is known that males can discriminate between well-fed and hungry females (Barry et al.  
228 2010; Brown et al. 2012). Thus, feeding females could be more attractive not because prey-  
229 handling makes them less able to attack but because feeding provides a cue to males that  
230 females are becoming satiated and therefore less dangerous (Avigliano et al. 2016). Our  
231 experimental design accounted for this possibility by providing females with equivalent  
232 access to large numbers of prey immediately before or during trials. This meant that any  
233 difference in male approach in the presence versus absence of prey was unlikely to be due to  
234 differences in female hunger. We found that matings were initiated more frequently and more  
235 quickly when females were actively foraging (i.e., not satiated the previous day), suggesting  
236 that, in this case, males assessed the risk of cannibalism using cues associated with female  
237 foraging behaviour rather than perceived hunger levels. These results lend strong support to  
238 the idea that distraction is an important signal for mating initiation in cannibalistic taxa  
239 (Maxwell 1998; Bilde et al. 2006; Uhl et al. 2015; Toft and Albo 2016). However, it is likely  
240 that males pay attention to the entire predation sequence when timing their approach, with  
241 certain behavioural cues provoking greater response than others (Scardamaglia et al. 2015).  
242 Finer-scale observations would be a valuable next step in assessing the relative importance of  
243 specific behaviours, such as stalking, striking and feeding, in mating initiation.

244

245 Our results are broadly consistent with the prediction that competition to fertilise eggs  
246 hastens the onset of mating in protandrous mating systems (Darwin 1871; Thornhill and  
247 Alcock 1983; Herberstein et al. 2017). Males in our experiment increased their mating effort  
248 in the presence of a rival by initiating matings more rapidly and more frequently. However,  
249 rival presence did not alter the incidence of cannibalism. Thus, our results provide no  
250 evidence that enhanced motivation to mate under competition causes males to misjudge the  
251 risk of cannibalism by approaching females too hastily. This is in contrast to the red back  
252 spider in which the presence of a rival increases the incidence of precopulatory cannibalism  
253 by causing males to spend less time in premating courtship than is necessary to convince  
254 females to mate (Stoltz et al. 2008). However, the low rate of cannibalism in our study was  
255 probably due to all females being well satiated rather than because of the presence or absence



256 of male rivals. How competition for females of differing hunger levels affects cannibalism  
257 risk therefore remains an open question.

258

259 We predicted that the presence of prey could modulate male-male competition for mates if  
260 mating tactics are influenced by female feeding behaviour. We found very large effects when  
261 both a rival and prey were present, and small effects when only a rival or prey were present,  
262 indicating that male mating success is enhanced by the concurrent presence of both cues. This  
263 suggests that males may experience a higher risk of competition when females are distracted  
264 with foraging, and so approach faster to avoid rivals reaching such females first, resulting in  
265 higher mating success. These results highlight the general importance of considering a range  
266 of realistic ecological contexts for male anti-cannibalism strategies. Staged experiments that  
267 fail to account for important sources of ecological variation (such as the density of prey and  
268 competitors) may over-estimate cannibalism rates and under-estimate the effectiveness of  
269 male counter adaptations. Further exploration of the influence of prey abundance and quality  
270 as well as male abundance in natural populations (e.g., Rabaneda-Bueno et al. 2008) will be  
271 necessary for understanding the adaptive significance of sexual cannibalism and its role in  
272 sexually antagonistic coevolution.

273

274

## 275 REFERENCES

- 276 Avigliano E, Scardamaglia RC, Gabelli FM, Pompilio L. 2016. Males choose to keep their  
277 heads: preference for lower risk females in a praying mantid. *Behav Processes*. 129:80–85.  
278 doi:10.1016/j.beproc.2016.06.005. <http://dx.doi.org/10.1016/j.beproc.2016.06.005>.
- 279 Barry KL, Holwell GI, Herberstein ME. 2010. Multimodal mate assessment by male praying  
280 mantids in a sexually cannibalistic mating system. *Anim Behav*. 79(5):1165–1172.  
281 doi:10.1016/j.anbehav.2010.02.025.
- 282 Beani L, Turillazzi S. 1990. Male swarms at landmarks and scramble competition polygyny in  
283 *Polistes gallicus* (Hymenoptera: Vespidae). *J Insect Behav*. 3(4):545–556.  
284 doi:10.1007/BF01052017.
- 285 Bilde T, Tuni C, Elsayed R, Pekár S, Toft S. 2006. Death feigning in the face of sexual  
286 cannibalism. *Biol Lett*. 2(1):23–25. doi:10.1098/rsbl.2005.0392.
- 287 Brown WD, Muntz GA, Ladowski AJ. 2012. Low mate encounter rate increases male risk

- 288 taking in a sexually cannibalistic praying mantis. *PLoS One*. 7(4).  
289 doi:10.1371/journal.pone.0035377.
- 290 Dall SRX. 2010. Managing Risk: The Perils of Uncertainty. In: Westneat DF, Fox CW, editors.  
291 *Evolutionary Behavioral Ecology*. Oxford: Oxford University Press. p. 194–206.
- 292 Dall SRX, Johnstone RA. 2002. Managing uncertainty: information and insurance under the  
293 risk of starvation. *Philos Trans R Soc B Biol Sci*. 357(1427):1519–1526.  
294 doi:10.1098/rstb.2002.1061.
- 295 Darwin C. 1871. *The Descent of Man and Selection in Relation to Sex*. London: John Murray.
- 296 Elgar MA, Fahey BF. 1996. Sexual cannibalism, competition, and size dimorphism in the orb-  
297 weaving spider *Nephila plumipes* Latreille (Araneae: Araneoidea). *Behav Ecol*. 7(2):195–198.  
298 doi:10.1093/beheco/7.2.195.
- 299 Elgar MA, Schneider JM. 2004. Evolutionary significance of sexual cannibalism. *Adv Study*  
300 *Behav*. 34(4):135–163.
- 301 Elgar Mark A. 1992. Sexual cannibalism in spiders and other invertebrates. In: Elgar Mark  
302 Adrian, Crespi BJ, editors. *Cannibalism: Ecology and Evolution Among Diverse Taxa*. Oxford:  
303 Oxford University Press. p. 128–155.
- 304 Emlen ST, Oring L. 1977. Ecology, sexual selection and the evolution of mating systems.  
305 *Science* (80- ). 197:215–223. doi:10.1126/science.327542.
- 306 Fisher AM, Holwell GI, Price TAR. 2020. Behavioural correlations and aggression in praying  
307 mantids. *Behav Ecol Sociobiol*. 74(5). doi:10.1007/s00265-020-02839-8.
- 308 Fromhage L, Schneider JM. 2005. Safer sex with feeding females: Sexual conflict in a  
309 cannibalistic spider. *Behav Ecol*. 16(2):377–382. doi:10.1093/beheco/ari011.
- 310 Gemeno C, Claramunt J. 2006. Sexual approach in the praying mantid *Mantis religiosa* (L.). *J*  
311 *Insect Behav*. 19(6):731–740. doi:10.1007/s10905-006-9058-8.
- 312 Glass G V, Smith ML, McGaw B. 1981. *Meta-analysis in social research*. Beverly Hills: SAGE  
313 publications.
- 314 Herberstein ME, Painting CJ, Holwell GI. 2017. Scramble competition polygyny in terrestrial  
315 arthropods. In: Naguib M, Podos J, Simmons LW, Barrett L, D HS, Zuk M, editors. *Advances in*  
316 *the Study of Behavior*. Vol. 49. Cambridge: Elsevier. p. 237–295.  
317 <http://dx.doi.org/10.1016/bs.asb.2017.01.001>.
- 318 Magnhagen C. 1991. Predation risk as a cost of reproduction. *Trends Ecol Evol*. 6(6):183–  
319 186. doi:10.1016/0169-5347(91)90210-O.

- 320 Mathot KJ, Wright J, Kempenaers B, Dingemanse NJ. 2012. Adaptive strategies for managing  
321 uncertainty may explain personality-related differences in behavioural plasticity. *Oikos*.  
322 121(7):1009–1020. doi:10.1111/j.1600-0706.2012.20339.x.
- 323 Maxwell MR. 1998. The risk of cannibalism and male mating behaviour in the  
324 mediterranean praying mantis, *Iris oratoria*. *Behaviour*. 136:205–219.
- 325 Maxwell MR. 1999. Mating behavior. In: Prete FR, editor. *The praying mantids*. Baltimore:  
326 Johns Hopkins University Press. p. 69–89.
- 327 Parker GA. 1979. Sexual selection and sexual conflict. In: Blum N, Blum M, editors. *Sexual*  
328 *Selection and Reproductive Competition in Insects*. New York: Academic Press. p. 123–166.
- 329 Prenter J, Elwood RW, Montgomery WI. 1994. Male exploitation of female predatory  
330 behaviour reduces sexual cannibalism in male autumn spiders, *Metellina segmentata*. *Anim*  
331 *Behav*. 47(1):235–236. doi:10.1006/anbe.1994.1031.
- 332 Price AC, Rodd HF. 2006. The effect of social environment on male-male competition in  
333 guppies (*Poecilia reticulata*). *Ethology*. 112(1):22–32. doi:10.1111/j.1439-  
334 0310.2006.01142.x.
- 335 Prokop P, Václav R. 2005. Males respond to the risk of sperm competition in the sexually  
336 cannibalistic praying mantis, *Mantis religiosa*. *Ethology*. 111(9):836–848.  
337 doi:10.1111/j.1439-0310.2005.01113.x.
- 338 Rabaneda-Bueno R, Rodríguez-Gironés MÁ, Aguado-de-la-Paz S, Fernández-Montraveta C,  
339 De Mas E, Wise DH, Moya-Laraño J. 2008. Sexual cannibalism: High incidence in a natural  
340 population with benefits to females. *PLoS One*. 3(10). doi:10.1371/journal.pone.0003484.
- 341 Scardamaglia RC, Fosachea S, Pompilio L. 2015. Sexual conflict in a sexually cannibalistic  
342 praying mantid: Males prefer low-risk over high-risk females. *Anim Behav*. 99:9–14.  
343 doi:10.1016/j.anbehav.2014.10.013. <http://dx.doi.org/10.1016/j.anbehav.2014.10.013>.
- 344 Schneider JM. 2014. Sexual Cannibalism as a Manifestation of Sexual Conflict. *Cold Spring*  
345 *Harb Perspect Biol*. 6(11). doi:10.1101/cshperspect.a017731.
- 346 Schneider JM, Lubin Y. 1998. Intersexual conflict in spiders. *Oikos*. 83(3):496.  
347 doi:10.2307/3546677.
- 348 Simmons LW. 1986. Inter-male competition and mating success in the field cricket, *Gryllus*.  
349 *Anim Behav*. 34(1986):567–579.
- 350 Stoltz JA, Elias DO, Andrade MCB. 2008. Females reward courtship by competing males in a  
351 cannibalistic spider. *Behav Ecol Sociobiol*. 62(5):689–697. doi:10.1007/s00265-007-0493-0.

352 Thornhill R, Alcock J. 1983. The Evolution of Insect Mating Systems. Cambridge: Harvard  
353 University Press.

354 Toft S, Albo MJ. 2016. The shield effect: Nuptial gifts protect males against pre-copulatory  
355 sexual cannibalism. *Biol Lett.* 12(5). doi:10.1098/rsbl.2015.1082.

356 Uhl G, Zimmer SM, Renner D, Schneider JM. 2015. Exploiting a moment of weakness: Male  
357 spiders escape sexual cannibalism by copulating with moulting females. *Sci Rep.*  
358 5(November):1–7. doi:10.1038/srep16928.

359 Walker LA, Holwell GI. 2016. Sexual cannibalism in a facultative parthenogen: The springbok  
360 mantis (*Miomantis caffra*). *Behav Ecol.* 27(3):851–856. doi:10.1093/beheco/arv221.

361  
362  
363  
364  
365  
366  
367  
368  
369  
370  
371  
372  
373  
374  
375  
376  
377  
378  
379  
380

381 **Figure 1.**

382 Survival curves showing the proportion of females remaining unmated over the duration of  
383 mating trials. Censored observations are not depicted.

384

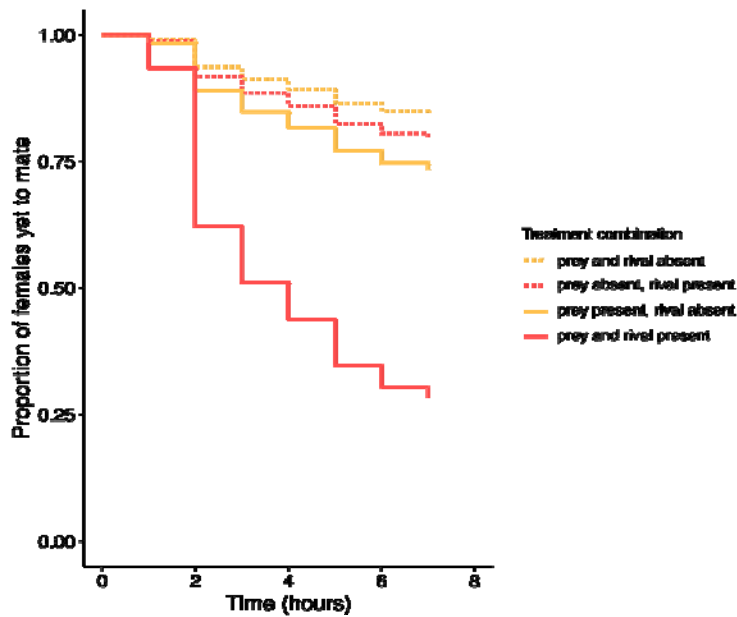

385

386

387

388

389

390

391

392

393

394

395

396

397

398

399

400

401

402 **Figure 2.**

403 Bar graph showing the proportion of mating trials that ended in mating.

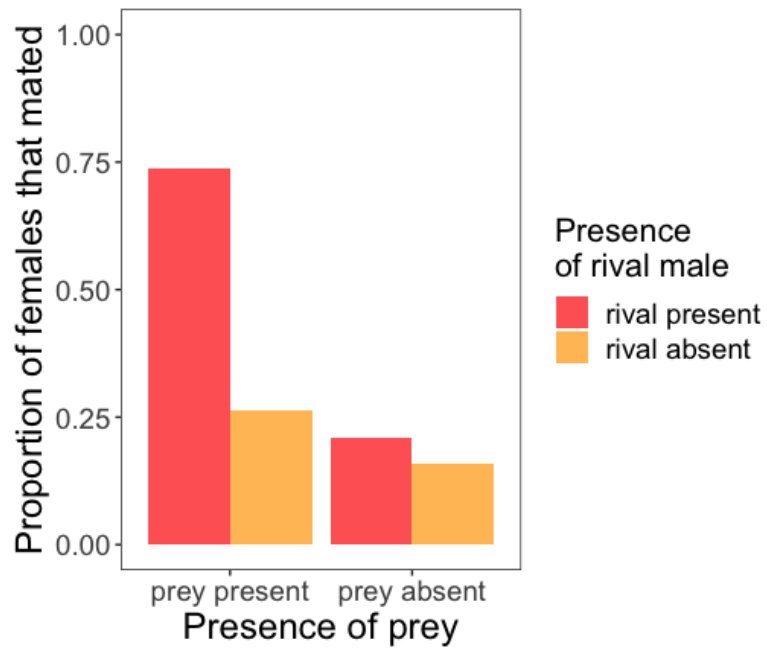

404

405
